# Supplementary material
Source: PubMed Central journal article supplement (PMC5755717)
Supplement: NIHMS928695-supplement.pdf [file NIHMS928695-supplement.pdf]

## Supplemental Figures:

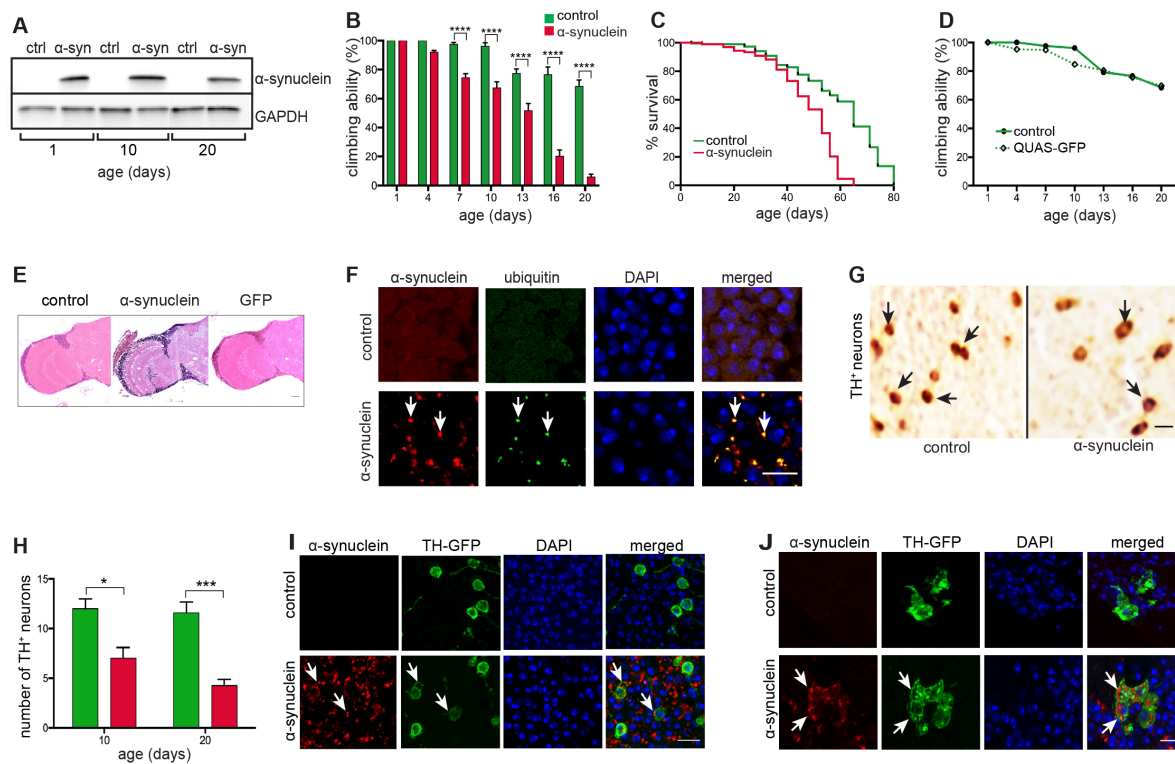

**Figure S1. Neurodegeneration and inclusion formation in  $\alpha$ -synuclein transgenic flies, Related to Figure 1**

(A) Western blot showing  $\alpha$ -synuclein levels in 1-, 10- and 20-day-old flies. The blot was reprobed for GAPDH to illustrate equivalent protein loading. Control is *Syb-QF2/+*.

(B) Behavioral analysis of motor deficits using the climbing test indicating changes in motor ability when  $\alpha$ -synuclein is expressed using the Q system.  $n=60$  per genotype. Control is *Syb-QF2/+*.

(C) Lifespan analysis showing early death in  $\alpha$ -synuclein transgenic flies (red) compared to control flies (green).  $n=300$  per genotype. Kaplan-Meier curve.  $p<0.01$ , log rank test. Control is *Syb-QF2/+*.

(D) Behavioral analysis of motor deficits using the climbing test indicating no changes in motor ability when GFP is expressed using the Q system. n=60 per genotype. Control is *Syb-QF2/+*.

(E) Hematoxylin and eosin staining showing no vacuolization in the medulla of 10-day-old GFP flies compared to  $\alpha$ -synuclein transgenic flies. Scale bar, 20  $\mu$ m. Control is *Syb-QF2/+*.

(F) Immunofluorescence staining showing that  $\alpha$ -synuclein aggregates are ubiquitin positive in 10-day-old  $\alpha$ -synuclein transgenic flies (arrows). Scale bar, 5  $\mu$ m. Control is *Syb-QF2/+*.

(G) Tyrosine hydroxylase (TH) immunostaining showing loss of TH-immunopositive dopaminergic neurons in the anterior medulla (arrows) in 10-day-old  $\alpha$ -synuclein transgenic flies compared to control flies. Scale bar, 5  $\mu$ m. Control is *Syb-QF2/+*.

(H) Quantification of TH-positive neurons in 10- and 20-day-old  $\alpha$ -synuclein transgenic flies compared to control flies. n=6 per genotype. Control is *Syb-QF2/+*.

(I and J) Immunofluorescent staining showing  $\alpha$ -synuclein aggregates in TH-positive neurons of the anterior medulla (I) and the central brain (J) in 10-day-old  $\alpha$ -synuclein transgenic flies (arrows). Scale bar, 5  $\mu$ m. Control is *UAS-mCD8-GFP/+; TH-GAL4, Syb-QF2*.

Asterisks indicate \*p<0.01, \*\*\*p<0.0002 and \*\*\*\*p<0.0001, two-way ANOVA in (B), (D) and (H) with Student's Newman-Keuls test. Data is represented as mean  $\pm$  SEM.

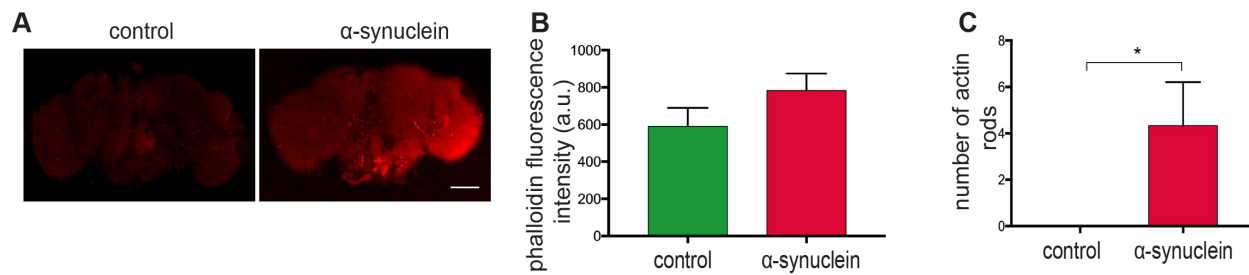

**Figure S2. Actin-rich rods are present at 1 day of age in  $\alpha$ -synuclein transgenic flies, Related to Figure 2**

(A and B) F-actin staining of whole mount brains of 1-day-old  $\alpha$ -synuclein transgenic flies compared to control flies. Scale bar, 50  $\mu$ m. Quantification (B) of fluorescence intensity shows a trend toward increased F-actin in  $\alpha$ -synuclein transgenic flies. n=6 per genotype.

(C) Quantification of actin-rich inclusions in  $\alpha$ -synuclein transgenic flies reveals the presence of actin-rich rods in 1-day-old  $\alpha$ -synuclein transgenic flies. n=6 per genotype.

Asterisks indicate \*p<0.01, unpaired t-test. Data is represented as mean  $\pm$  SEM. Flies are 1 day old. Control in (A)-(C) is *Syb-QF2/+*.

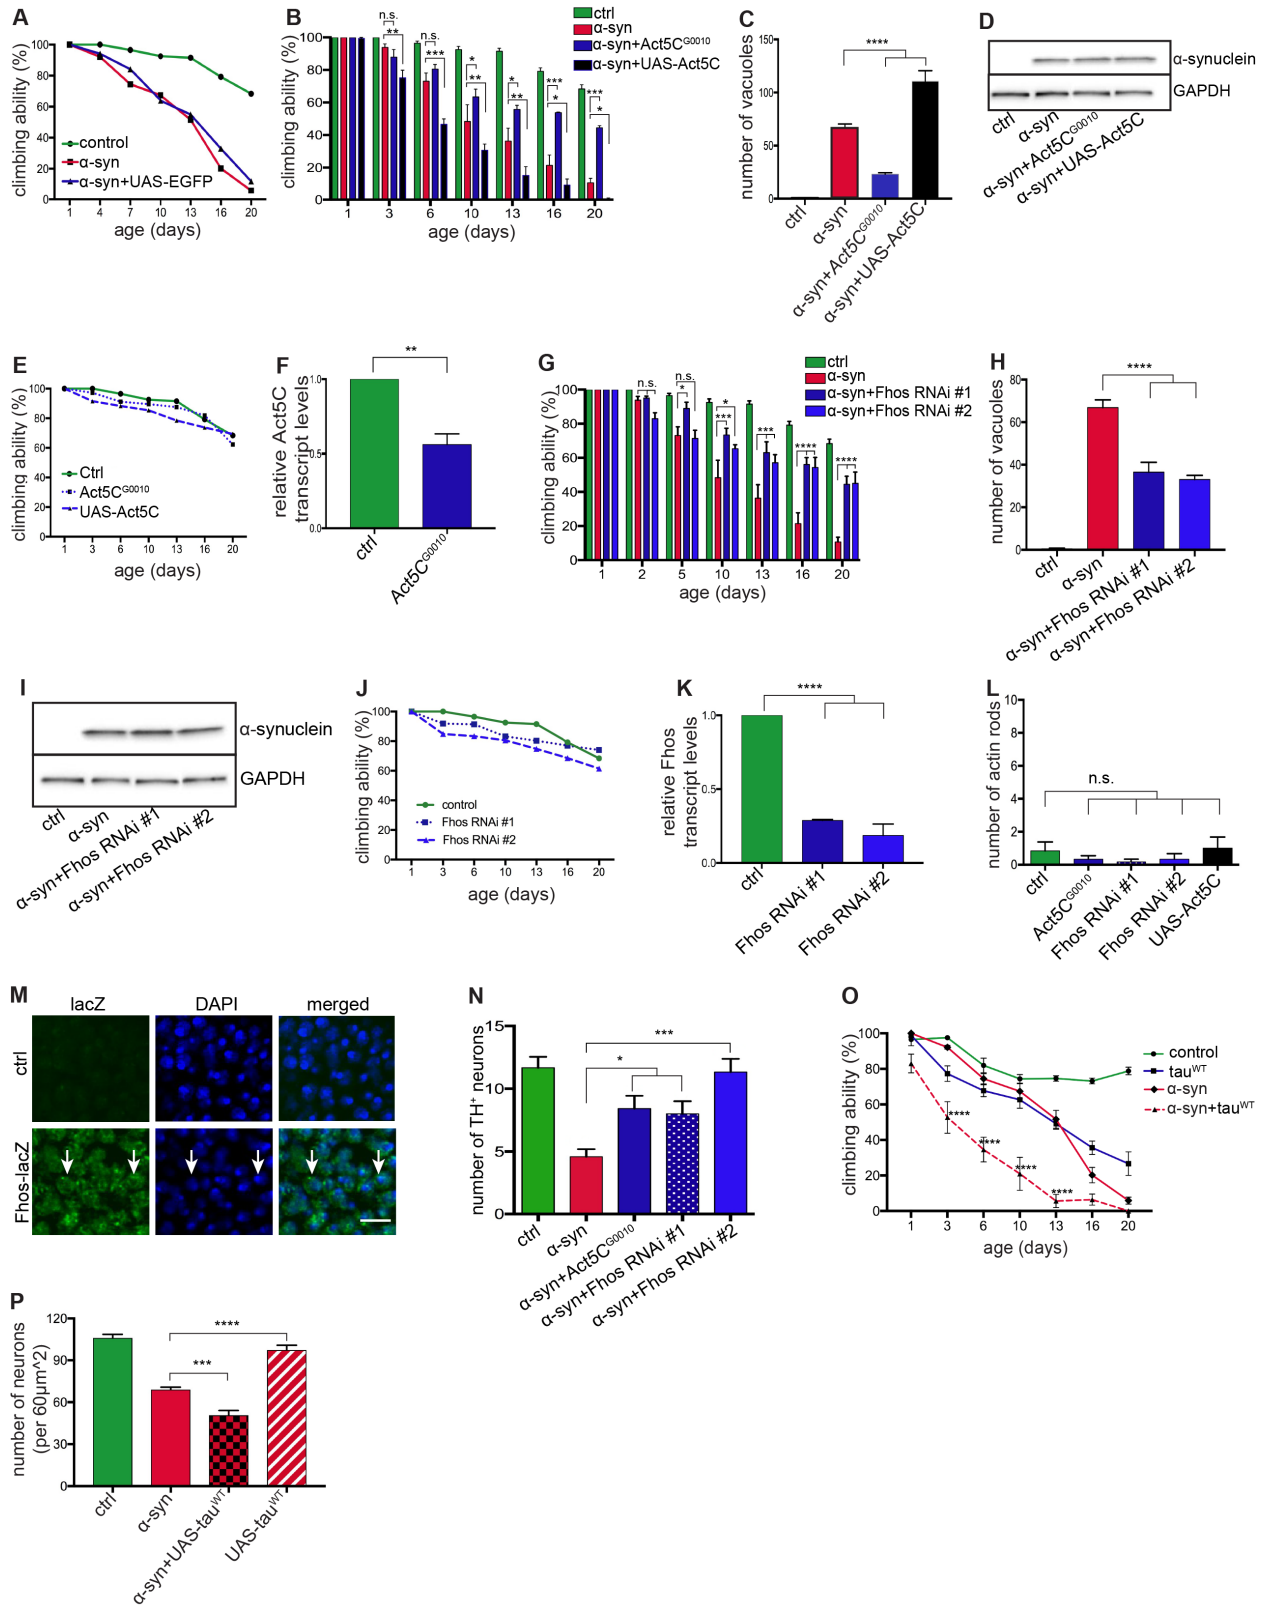

**Figure S3. Actin modifiers do not induce toxicity or influence  $\alpha$ -synuclein expression, Related to Figure 3.**

(A) Behavioral analysis of motor deficits using the climbing test showing no enhancement of motor deficits when the *elav-GAL4* driver is used to express EGFP as a control in  $\alpha$ -synuclein transgenic flies. n=60 per genotype.

(B and C) Genetic modification of locomotor ability (B) and vacuole formation (C) in  $\alpha$ -synuclein transgenic flies showing rescue by reducing actin in animals heterozygous for *Act5C<sup>G0010</sup>* and enhancement with overexpression of actin (*UAS-Act5C*). n=60 per genotype. Flies are 10 days old in (C).

(D and I) Western blot showing normal  $\alpha$ -synuclein protein levels following genetic actin manipulation in  $\alpha$ -synuclein flies. The blots are reprobbed for GAPDH to illustrate equivalent protein loading. Flies are 1 day old.

(E and J) Behavioral analyses using the climbing assay showing no significant locomotor deficits with genetic actin cytoskeleton manipulation in the absence of transgenic  $\alpha$ -synuclein expression. n=60 per genotype.

(F and K) Real time quantitative PCR for *Act5C* (F) and *Fhos* (K) transcript levels shows a reduction in *Act5C* and *Fhos* expression in flies heterozygous for *Act5C<sup>G0010</sup>* or expressing an RNAi directed to *Fhos*. n=6 per genotype. Flies are 1 day old.

(G and H) Genetic rescue of locomotor dysfunction (G) and vacuole formation (H) in  $\alpha$ -synuclein transgenic flies expressing two transgenic RNAi lines directed to *Fhos*. n=60 per genotype. Flies are 10 days old in (H).

(L) Quantification of the number of actin-rich rods in brain sections shows no significant changes with genetic manipulation of the actin cytoskeleton in the absence of transgenic  $\alpha$ -synuclein expression. n=6 per genotype. Flies are 10 days old.

(M) Immunofluorescence showing expression of *Fhos* as monitored by the enhancer trap *Fhos*<sup>AA142</sup> (arrows). The reporter is nuclear because a nuclear import signal is present on  $\beta$ -galactosidase. Morphology of positive cells is consistent with neurons. Scale bar, 5  $\mu$ m. Flies are 1 day old.

(N) Quantitative analysis of the number of TH-immunopositive neurons in the anterior medulla showing rescue of positively stained neurons following genetic manipulation of the actin cytoskeleton. n=6 per genotype. Flies are 20 days old.

(O) Analysis of climbing reflecting enhanced locomotor deficits in  $\alpha$ -synuclein transgenic flies expressing wild type human tau. n=60 per genotype.

(P) Quantification of cortical neurons in the anterior medulla showing decreased neuronal density in 10-day-old  $\alpha$ -synuclein transgenic flies expressing wild type human tau. n=6 per genotype.

Asterisks indicate \*p<0.01, \*\*p<0.001, \*\*\*p<0.0002, and \*\*\*\*p<0.0001, two-way ANOVA in (A), (B), (E), (G), (J) and (O), one-way ANOVA in (C), (H), (K), (L), (N) and (P) with Student-Newman-Keuls test, and unpaired t-test in (F). Data is represented as mean  $\pm$  SEM. Control (ctrl) in (A)-(D), (H), (I), (N) and (P) is *elav-GAL4/+; Syb-QF2/+* and in (E), (F), (J)-(M) and (O) is *elav-GAL4/+*

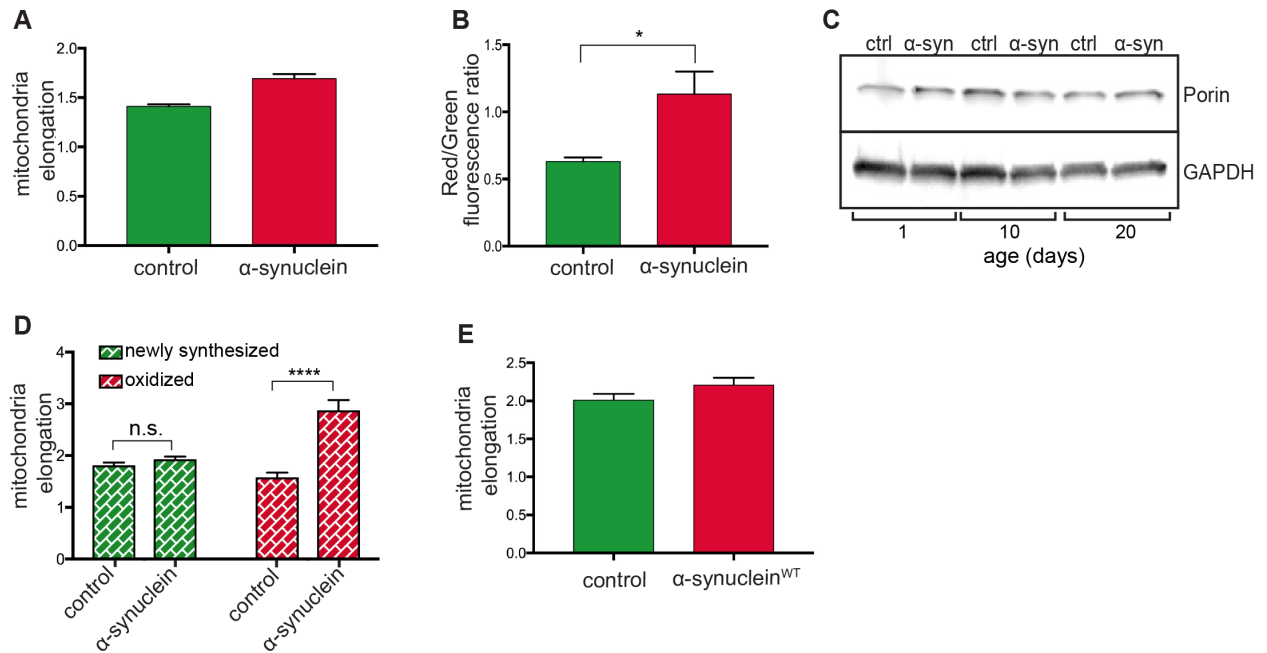

**Figure S4. Mitochondrial abnormalities in  $\alpha$ -synuclein transgenic flies, Related to Figure 4.**

(A) Measurements of mitochondrial elongation showing a trend toward mitochondrial enlargement in 1-day-old  $\alpha$ -synuclein transgenic flies.  $n=6$  per genotype. Control is *Syb-QF2/+*.

(B) Mitochondrial protein oxidation as monitored by the transition from green to red fluorescence in MitoTimer protein is consistent with early mitochondrial dysfunction in 1-day-old  $\alpha$ -synuclein transgenic flies.  $n=6$  per genotype. Control is *elav-GAL4/+; UAS-MitoTimer/Syb-QF2*.

(C) Western blot probed for with an antibody to porin showing no changes in 1-, 10- and 20-day-old  $\alpha$ -synuclein flies compared to controls. The blot is reprobed with an antibody recognizing GAPDH to illustrate equivalent protein loading. Control is *Syb-QF2/+*.

(D) Measurement of elongation in newly synthesized and oxidized mitochondria reveal mitochondrial enlargement in oxidized mitochondria in  $\alpha$ -synuclein transgenic flies. n=6 per genotype. Control is *elav-GAL4/+; UAS-MitoTimer/Syb-QF2*.

(E) Measurements of mitochondrial elongation show no changes in mitochondrial morphology in 12-month-old human wild type  $\alpha$ -synuclein transgenic mice compared to controls. n=4 per genotype.

Asterisks indicate \* $p < 0.01$ , unpaired t-test. Data is represented as mean  $\pm$  SEM. Flies are 1 day old in (A and B) and 10 days old in (D).



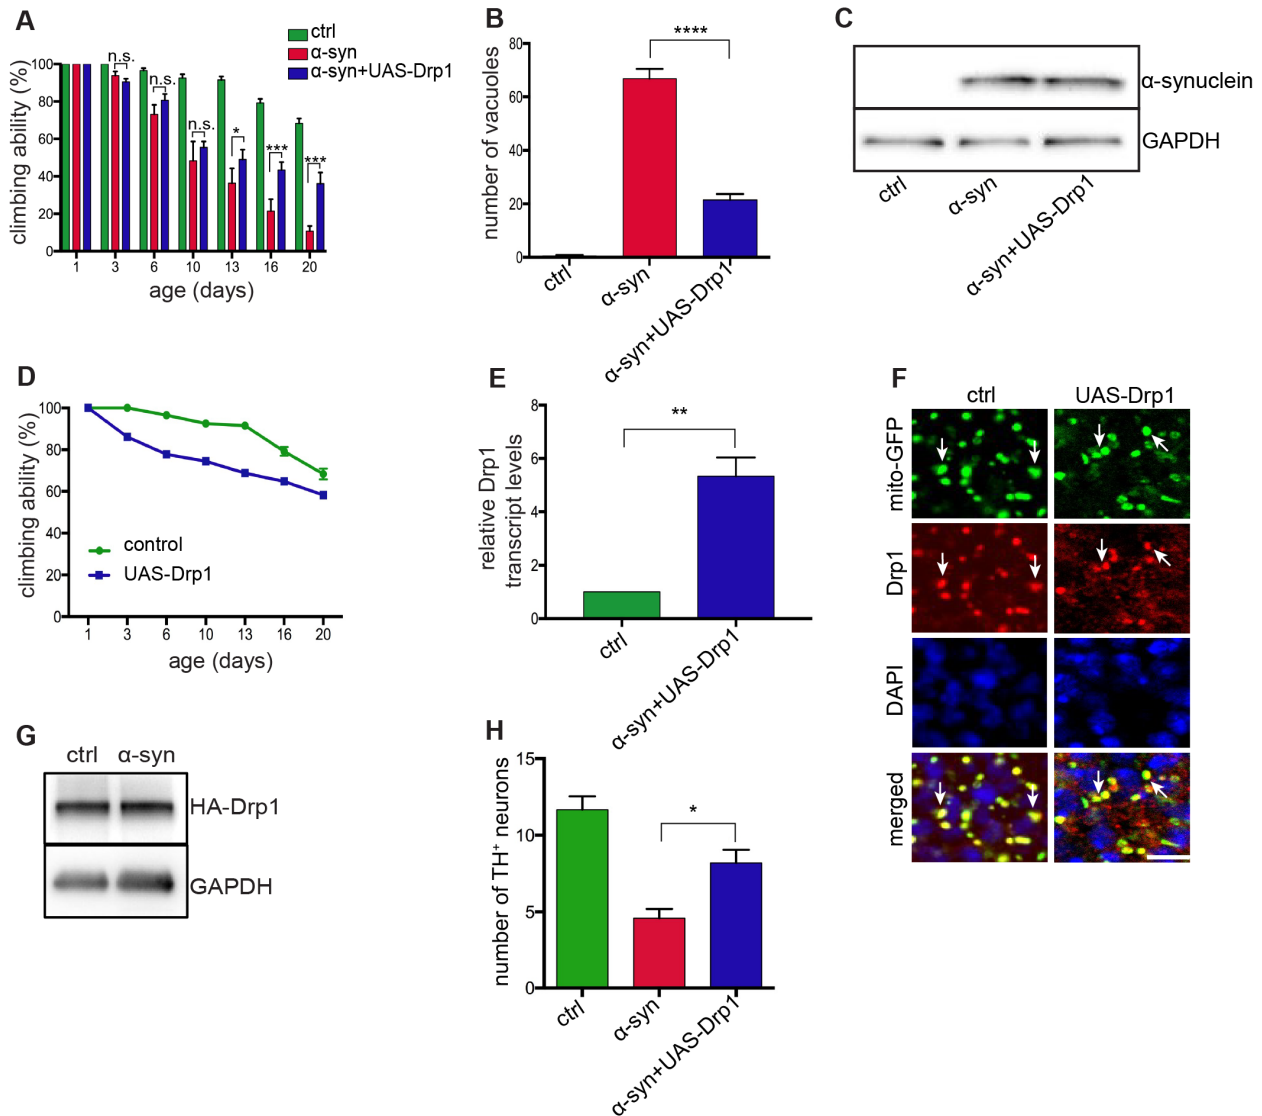

**Figure S5. Overexpression of Drp1 does not influence mitochondrial dynamics in the absence of transgenic  $\alpha$ -synuclein expression, Related to Figure 5.**

(A) Behavioral analysis of motor deficits using the climbing assay showing rescue in locomotor activity following overexpression of a previously characterized (DuBoff et al., 2012), moderately expressing Drp1 line. n=60 per genotype, two-way ANOVA with Student-Newman-Keuls test, \* $p < 0.01$  and \*\*\* $p < 0.0002$ . Control is *elav-GAL4/+; Syb-QF2/+*.

- (B) Quantification of vacuoles showing reduced number of vacuoles in the medulla of 10-day-old  $\alpha$ -synuclein transgenic flies following overexpression of Drp1 (*UAS-Drp1*). n=6 per genotype, one-way ANOVA with Student-Newman-Keuls test, \*\*\*\*p<0.0001. Flies are 10 days old. Control is *elav-GAL4/+; Syb-QF2/+*.
- (C) Western blot showing no change in  $\alpha$ -synuclein protein levels when Drp1 is overexpressed. The blot is reprobbed for GAPDH to illustrate equivalent protein loading. Flies are 1 day old. Control is *elav-GAL4/+; Syb-QF2/+*.
- (D) Behavioral analysis of motor deficits using the climbing assay showing no changes in locomotor activity following Drp1 overexpression. n=60 per genotype, two-way ANOVA with Student-Newman-Keuls test. Control is *elav-GAL4/+; Syb-QF2/+*.
- (E) Real time quantitative PCR for *Drp1* transcript levels shows an increase in *Drp1* expression in flies overexpressing the *UAS-Drp1* construct. n=6 per genotype, unpaired t-test, \*\*p<0.001. Flies are 1 day old. Control is *elav-GAL4/+*
- (F) Drp1 localization to the mitochondria, as monitored by HA-tagged Drp1 (*HA-Drp1*), is not affected following Drp1 overexpression (arrows). Scale bar, 5  $\mu$ m. Flies are 10 days old. Control is *elav-GAL4/+; Mito-GFP/+; HA-Drp1/Syb-QF2*.
- (G) Western blot showing no changes in Drp1 expression, as monitored by immunoblotting with an antibody directed to HA to detect HA-tagged Drp1 when transgenic  $\alpha$ -synuclein is expressed. Flies are 1 day old. Control is *elav-GAL4/+; HA-Drp1/Syb-QF2*.
- (H) Quantitative analysis of the number of TH-immunopositive neurons in the anterior medulla showing rescue of positively stained neurons following overexpression of Drp1.

n=6 per genotype, one-way ANOVA with Student-Newman-Keuls test, \*p<0.01. Flies are 20 days old. Control is *elav-GAL4/+; Syb-QF2/+*.

Data is represented as mean  $\pm$  SEM.

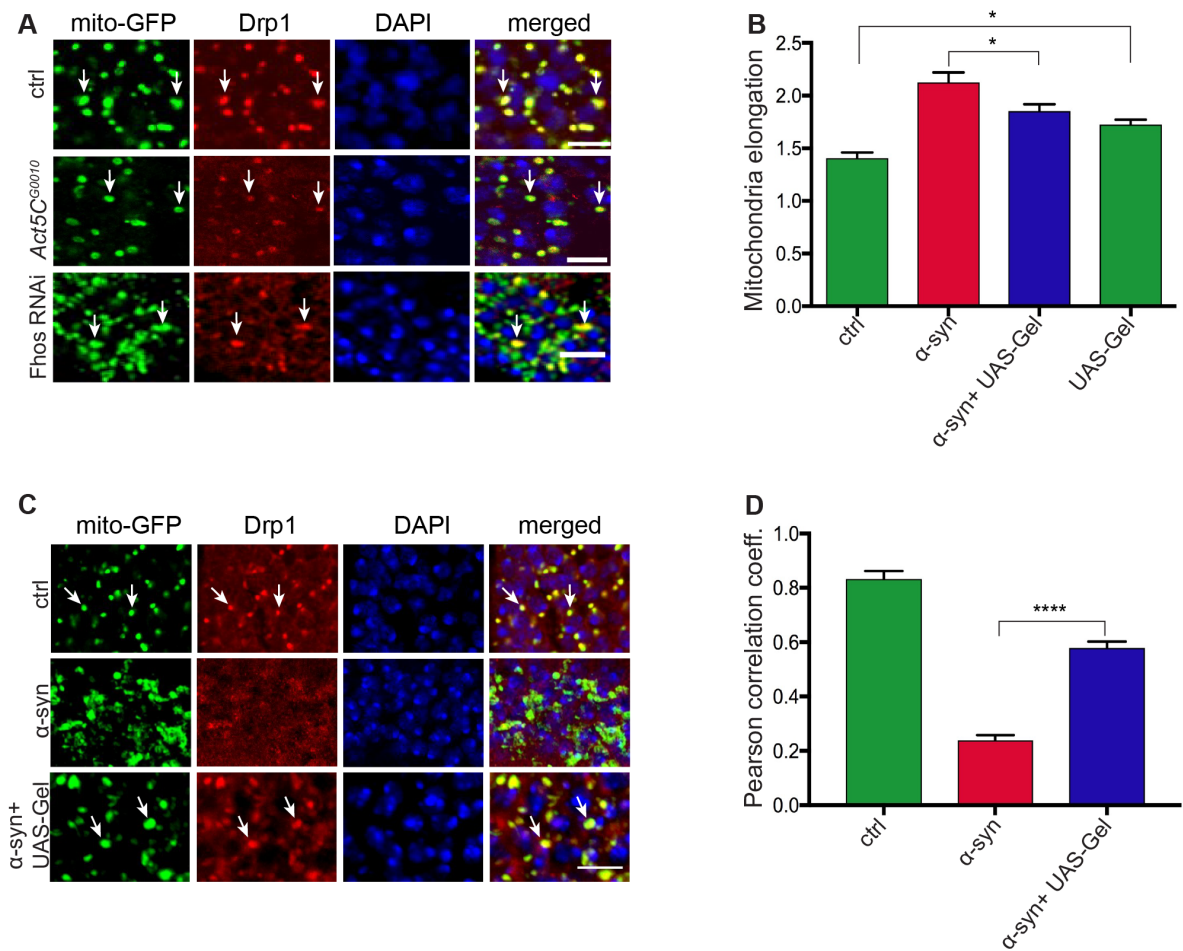

**Figure S6. Drp1 translocation to the mitochondria outer membrane is dependent on actin dynamics, Related to Figure 6.**

(A) Drp1 localization to the mitochondria, as monitored by HA-tagged Drp1 (*HA-Drp1*), shows no mislocalization in animals with one copy of *Act5C<sup>G0010</sup>* or following expression of an RNAi line directed to *Fhos* (arrows) in the absence of  $\alpha$ -synuclein overexpression. Scale bar, 5  $\mu$ m. Control is *elav-GAL4/+; Mito-GFP/+; HA-Drp1/Syb-QF2*.

(B) Quantification of mitochondrial morphology showing reduced enlargement in  $\alpha$ -synuclein flies overexpressing Gelsolin. n=6 per genotype. Control is *elav-GAL4/+; Syb-QF2/+*.

(C and D) Drp1 localization to the mitochondria, as monitored by HA-tagged Drp1 (*HA-Drp1*) and quantification (D) shows rescued Drp1 colocalization following overexpression of Gelsolin (arrows). Scale bar, 5  $\mu$ m. n=6 per genotype. Control is *elav-GAL4/+; HA-Drp1/Syb-QF2*.

Asterisks indicates \* $p < 0.01$ , \*\* $p < 0.002$ , one-way ANOVA with Student-Newman-Keuls test. Data is represented as mean  $\pm$  SEM. Flies are 10 days old.

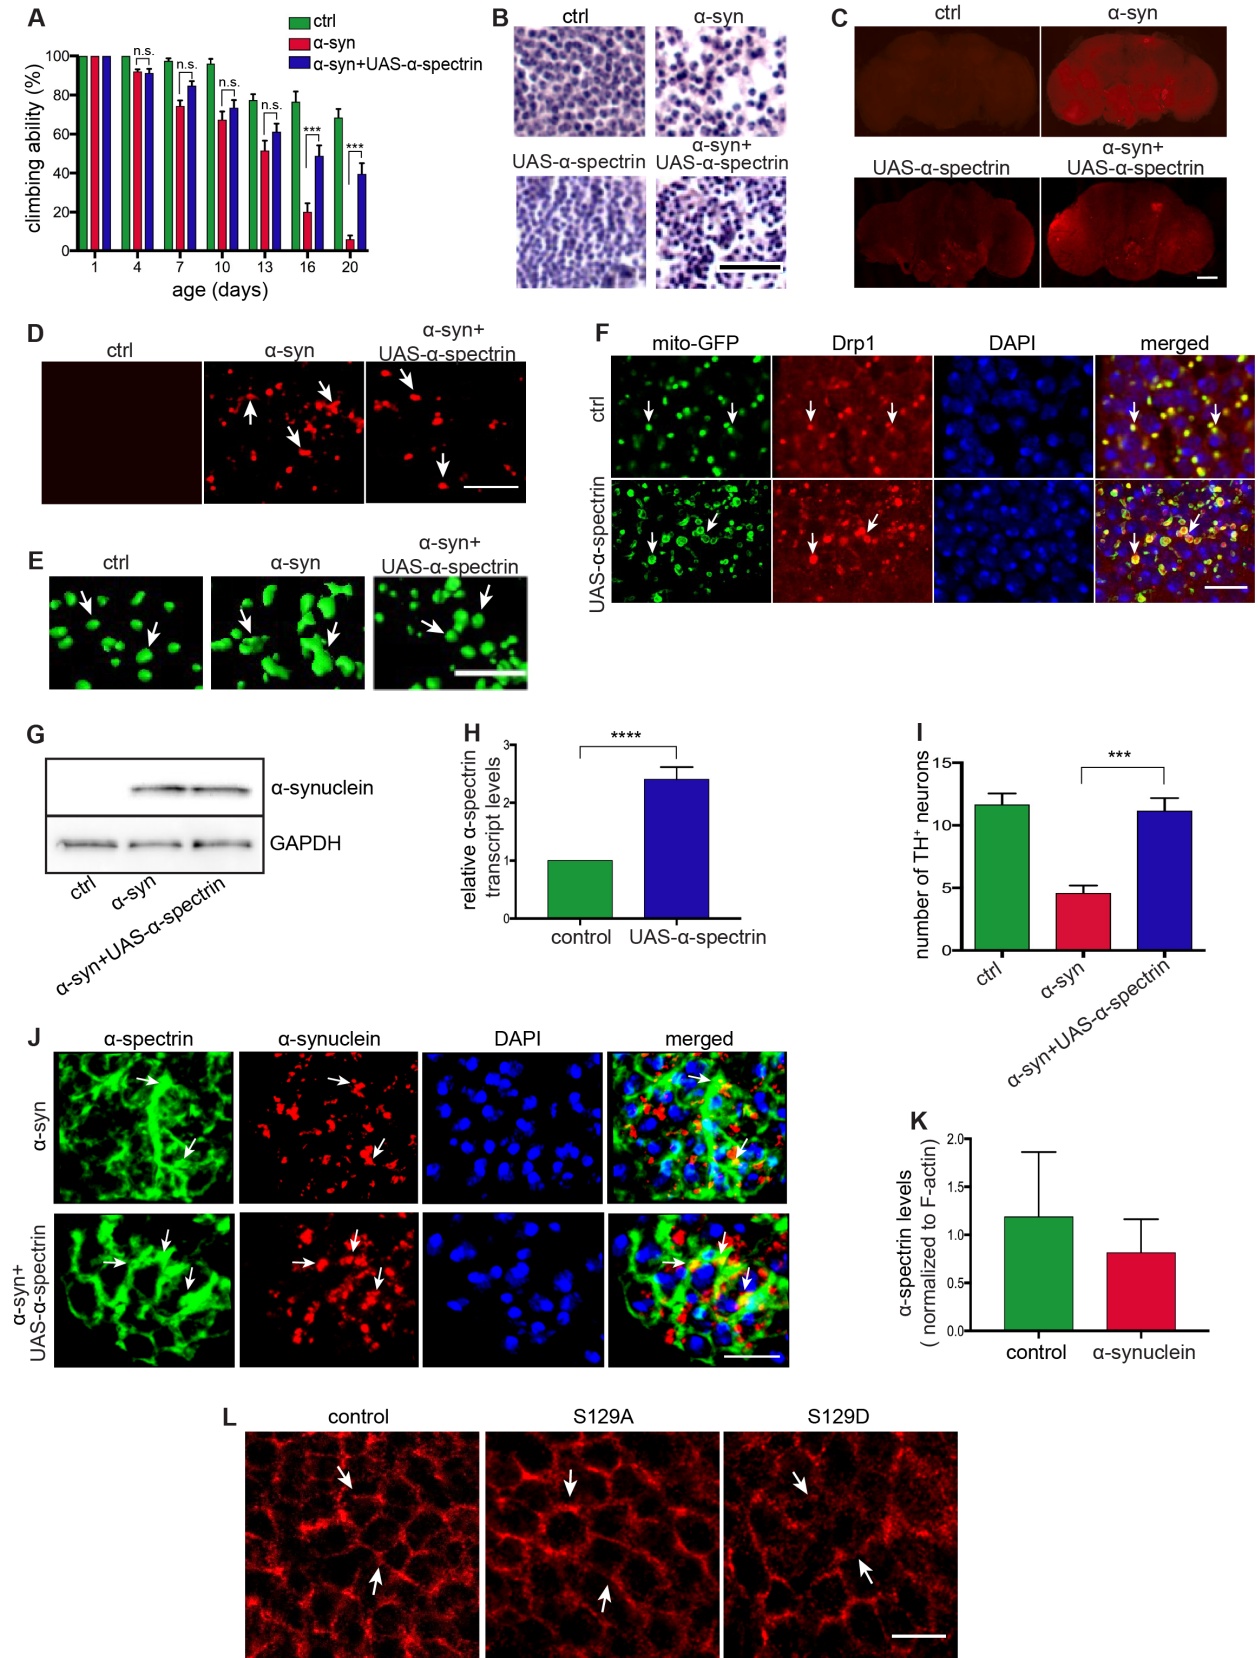

**Figure S7. Overexpression of  $\alpha$ -spectrin does not induce neurotoxicity in the absence of transgenic  $\alpha$ -synuclein expression, Related to Figure 7.**

(A) Rescue of locomotor deficits by overexpression of  $\alpha$ -spectrin (*UAS- $\alpha$ -spectrin*) in  $\alpha$ -synuclein transgenic flies. n=60 per genotype, two-way ANOVA with Student-Newman-Keuls test, \*\*\*p<0.0002. Control (ctrl) is *elav-GAL4/+; Syb-QF2/+*.

(B) Hematoxylin staining showing rescued neuronal density in 20-day-old  $\alpha$ -synuclein flies following overexpression of  $\alpha$ -spectrin. Scale bar, 20  $\mu$ m. Control (ctrl) is *elav-GAL4/+; Syb-QF2/+*.

(C) Phalloidin stained whole brain mounts of  $\alpha$ -synuclein transgenic flies overexpressing  $\alpha$ -spectrin. Scale bar, 50  $\mu$ m. Flies are 10 days old. Control is *elav-GAL4/+; Syb-QF2/+*.

(D) Presence of actin rods in the brains of  $\alpha$ -synuclein transgenic flies overexpressing  $\alpha$ -spectrin as determined by immunostained sections for actin. Scale bar, 3  $\mu$ m. Flies are 10 days old. Control (ctrl) is *elav-GAL4/+; Syb-QF2/+*.

(E) 3D reconstruction of immunofluorescence-stained mitochondria showing changes in mitochondrial morphology in central brain neurons of  $\alpha$ -synuclein transgenic flies overexpressing  $\alpha$ -spectrin. Scale bar, 5  $\mu$ m. Flies are 10 days old. Control is *elav-GAL4/+; Syb-QF2*.

(F) Drp1 localization to the mitochondria is not affected following  $\alpha$ -spectrin overexpression (*UAS- $\alpha$ -spectrin*) in the absence of  $\alpha$ -synuclein expression (arrows). Scale bar, 5  $\mu$ m. Flies are 10 days old. Control is *elav-GAL4/+; UAS-Drp1, Mito-GFP/+; HA-Drp1/Syb-QF2*.

(G) Western blot showing no changes in  $\alpha$ -synuclein protein levels when  $\alpha$ -spectrin is overexpressed in  $\alpha$ -synuclein transgenic flies. The blot is reprobbed for GAPDH to

illustrate equivalent protein loading. Flies are 1 day old. Control is *elav-GAL4/+; Syb-QF2/+*.

(H) Real time quantitative PCR for  $\alpha$ -spectrin transcript levels shows an increase in  $\alpha$ -spectrin expression in flies overexpressing  $\alpha$ -spectrin. n=6 per genotype, unpaired t-test, \*\*\*\*p<0.0001. Flies are 1 day old. Control is *elav-GAL4/+*.

(I) Quantitative analysis of the number of TH-immunopositive neurons in the anterior medulla showing rescue of positively stained neurons following overexpression of  $\alpha$ -spectrin. n=6 per genotype, one-way ANOVA with Student-Newman-Keuls test, \*\*\*p<0.0002. Flies are 20 days old. Control is *elav-GAL4/+; Syb-QF2/+*.

(J) 3D projection of immunofluorescence-stained *Drosophila* Kenyon cells showing colocalization of  $\alpha$ -spectrin and  $\alpha$ -synuclein signals in  $\alpha$ -synuclein transgenics and in  $\alpha$ -synuclein flies overexpressing  $\alpha$ -spectrin. Scale bar, 5  $\mu$ m. Flies are 10 days old.

(K) Quantitative western blot analysis of  $\alpha$ -spectrin levels from biotinylated phalloidin precipitated from  $\alpha$ -synuclein transgenic fly heads and controls shows a trend toward lower concentrations of  $\alpha$ -spectrin in  $\alpha$ -synuclein transgenics.  $\alpha$ -spectrin levels were normalized to F-actin. n=10 per genotype. Flies are 10 days old. Control is *elav-GAL4/+; Syb-QF2/+*.

(L) Immunofluorescence staining showing the normal subplasmalemmal staining pattern in controls (*elav-GAL4/+*) and in flies expressing the nontoxic phosphorylation incompetent (S129A)  $\alpha$ -synuclein (arrows), and disruption of the spectrin cytoskeleton in flies expressing the toxic phosphomimic (S129D) version of  $\alpha$ -synuclein (arrows). Scale bar, 5  $\mu$ m. Flies are 10 days old.

Data is represented as mean  $\pm$  SEM.



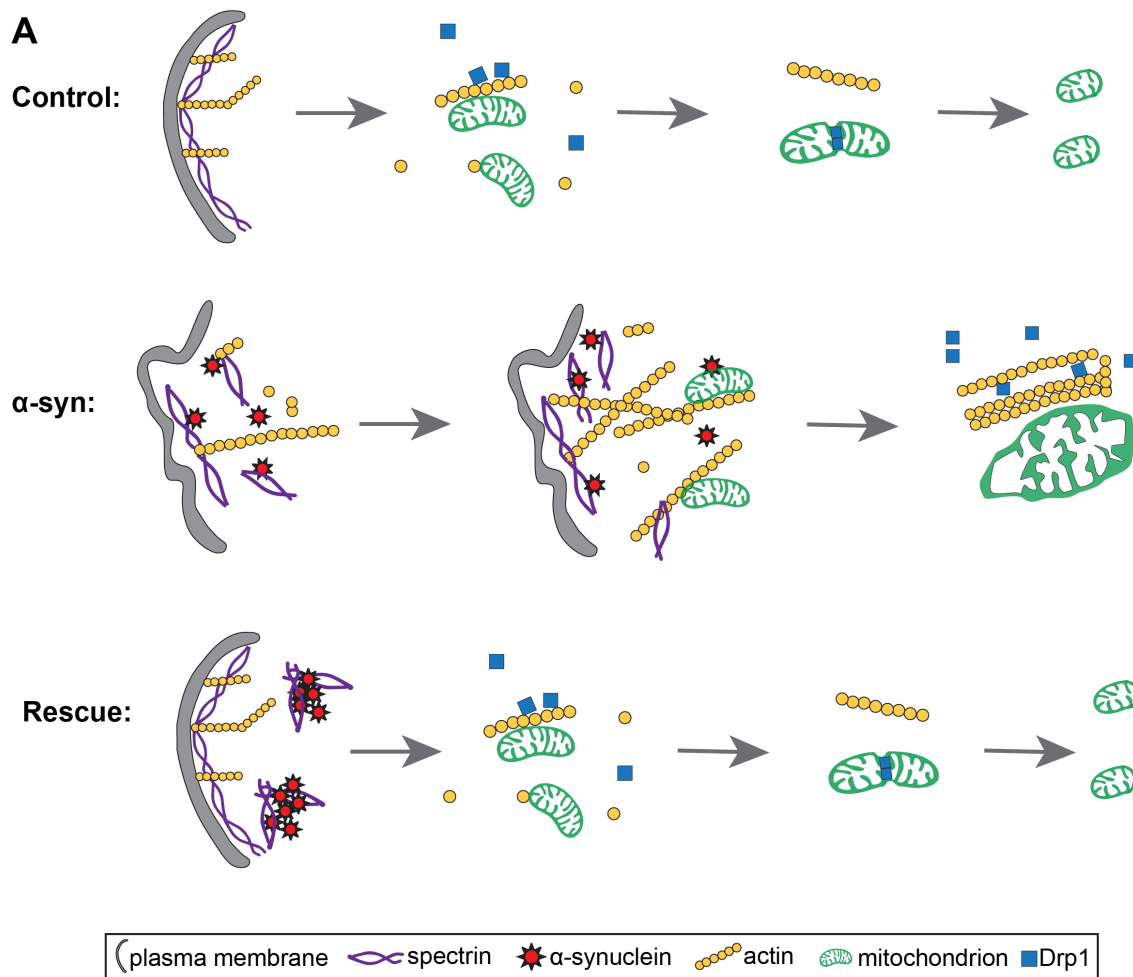

**Figure S8: Mechanism of  $\alpha$ -synuclein induced neurodegeneration, Related to Figure 7**

(A) Schematic of proposed mechanism of  $\alpha$ -synuclein induced mitochondrial abnormalities in  $\alpha$ -synucleinopathy.  $\alpha$ -synuclein binds to  $\alpha$ -spectrin, disrupting normal actin cytoskeletal organization, including promoting excess F-actin stabilization at mitochondria. Loss of actin dynamics and increased levels of F-actin at mitochondria inhibits productive Drp1 localization to mitochondria and mitochondrial fission, leading to mitochondrial dysfunction. Increasing the levels of  $\alpha$ -spectrin restores normal actin

cytoskeletal organization, Drp1 localization and mitochondrial fission by promoting sequestration of toxic  $\alpha$ -synuclein species into large inclusions.
